# Supplementary material for: Mammary gland tumor promotion by chronic administration of IGF1 and the insulin analogue AspB10 in the p53R270H/+WAPCre mouse model
Source: Springer Nature journal article supplement (doi:10.1186/s13058-015-0518-y), 2015-01-30
Supplement: MOESM1 [file 9781334]

**A1**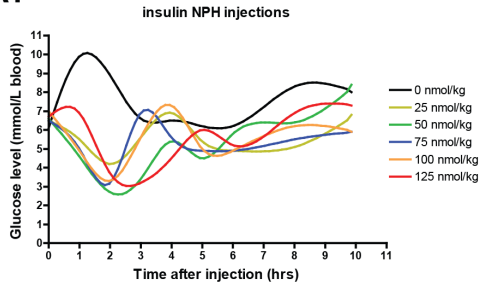**A2**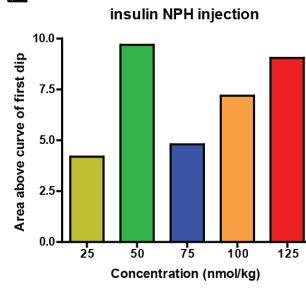**B1**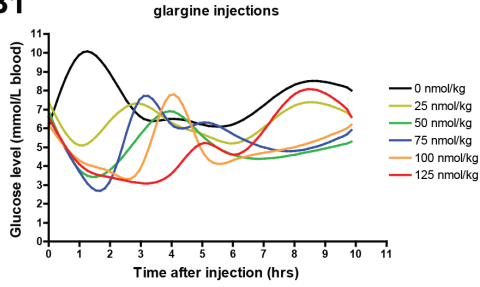**B2**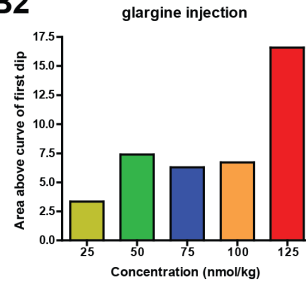**C1**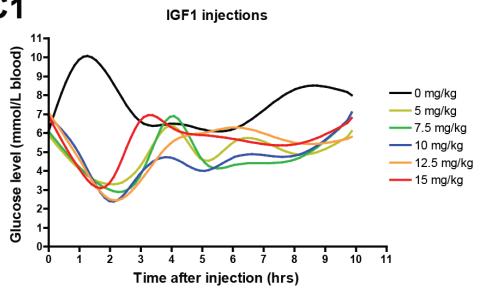**C2**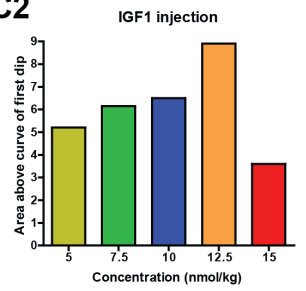**D1**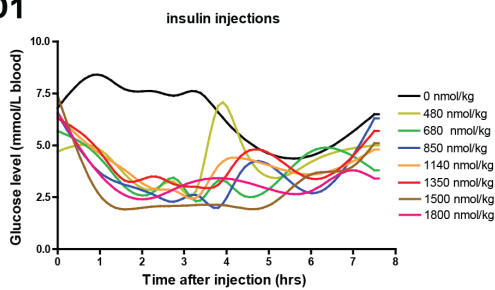**D2**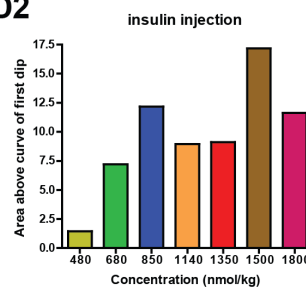**E1**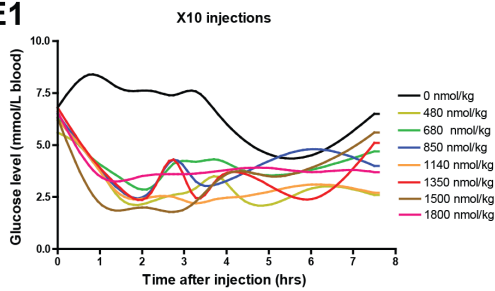**E2**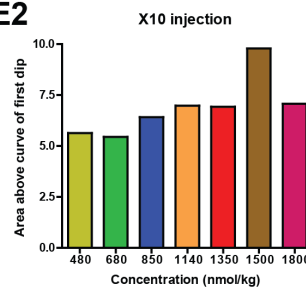

Supplemental Figure 1.

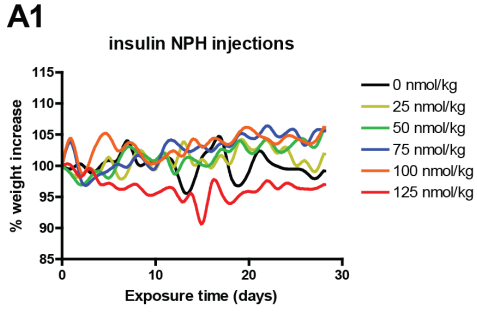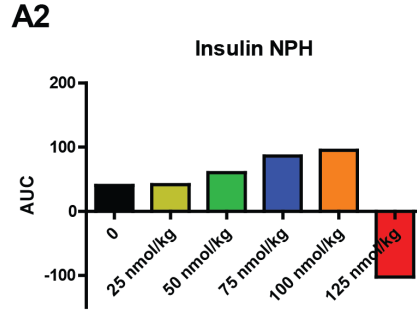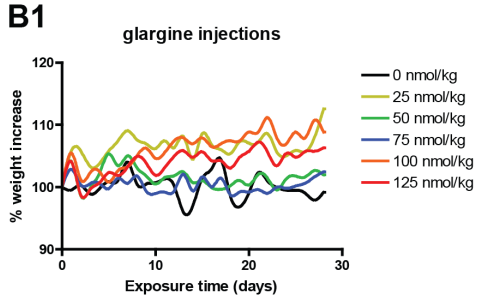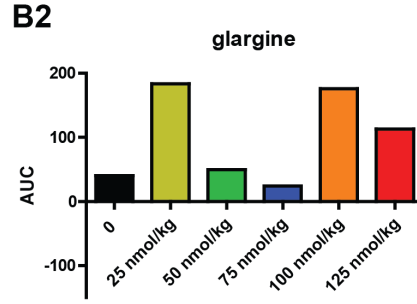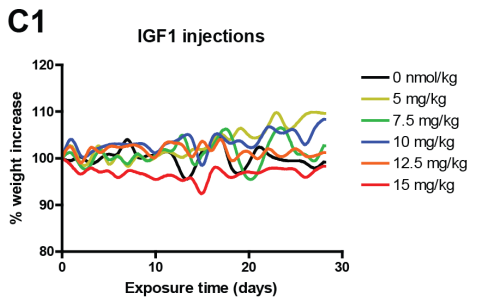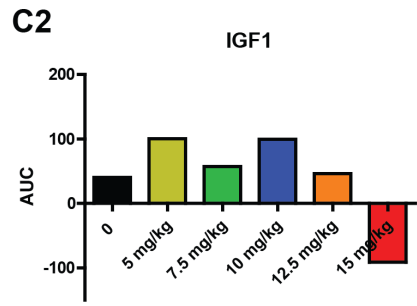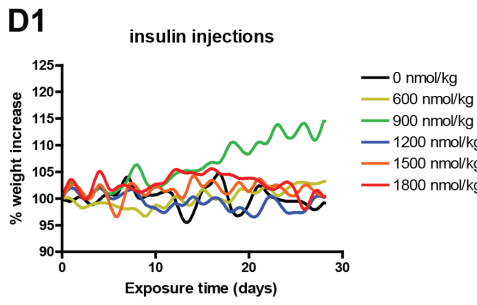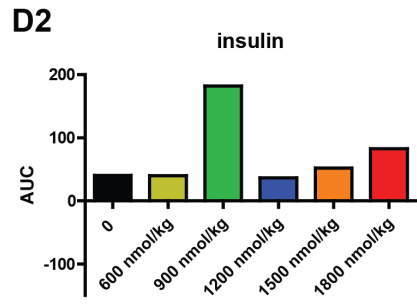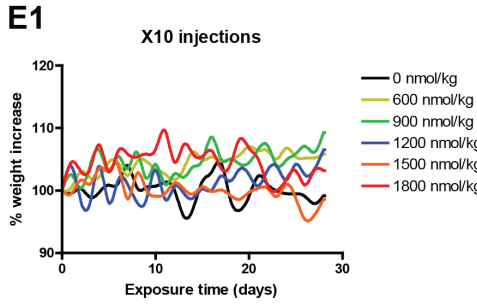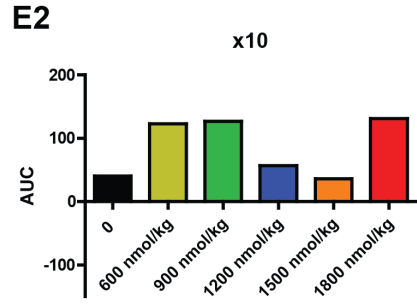

Supplemental Figure 2.

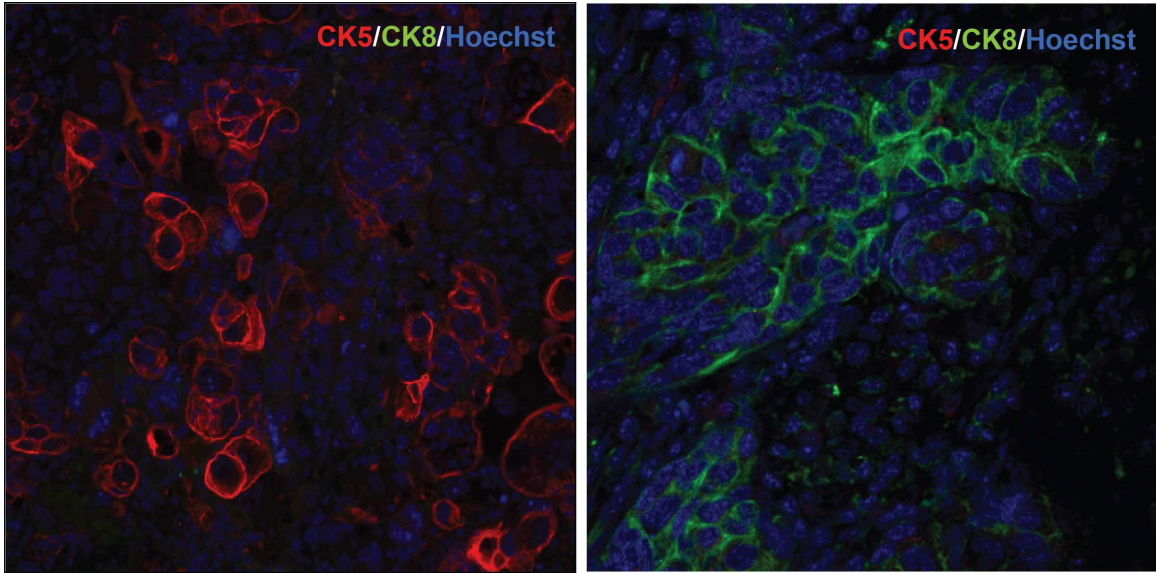

Supplemental Figure 3.

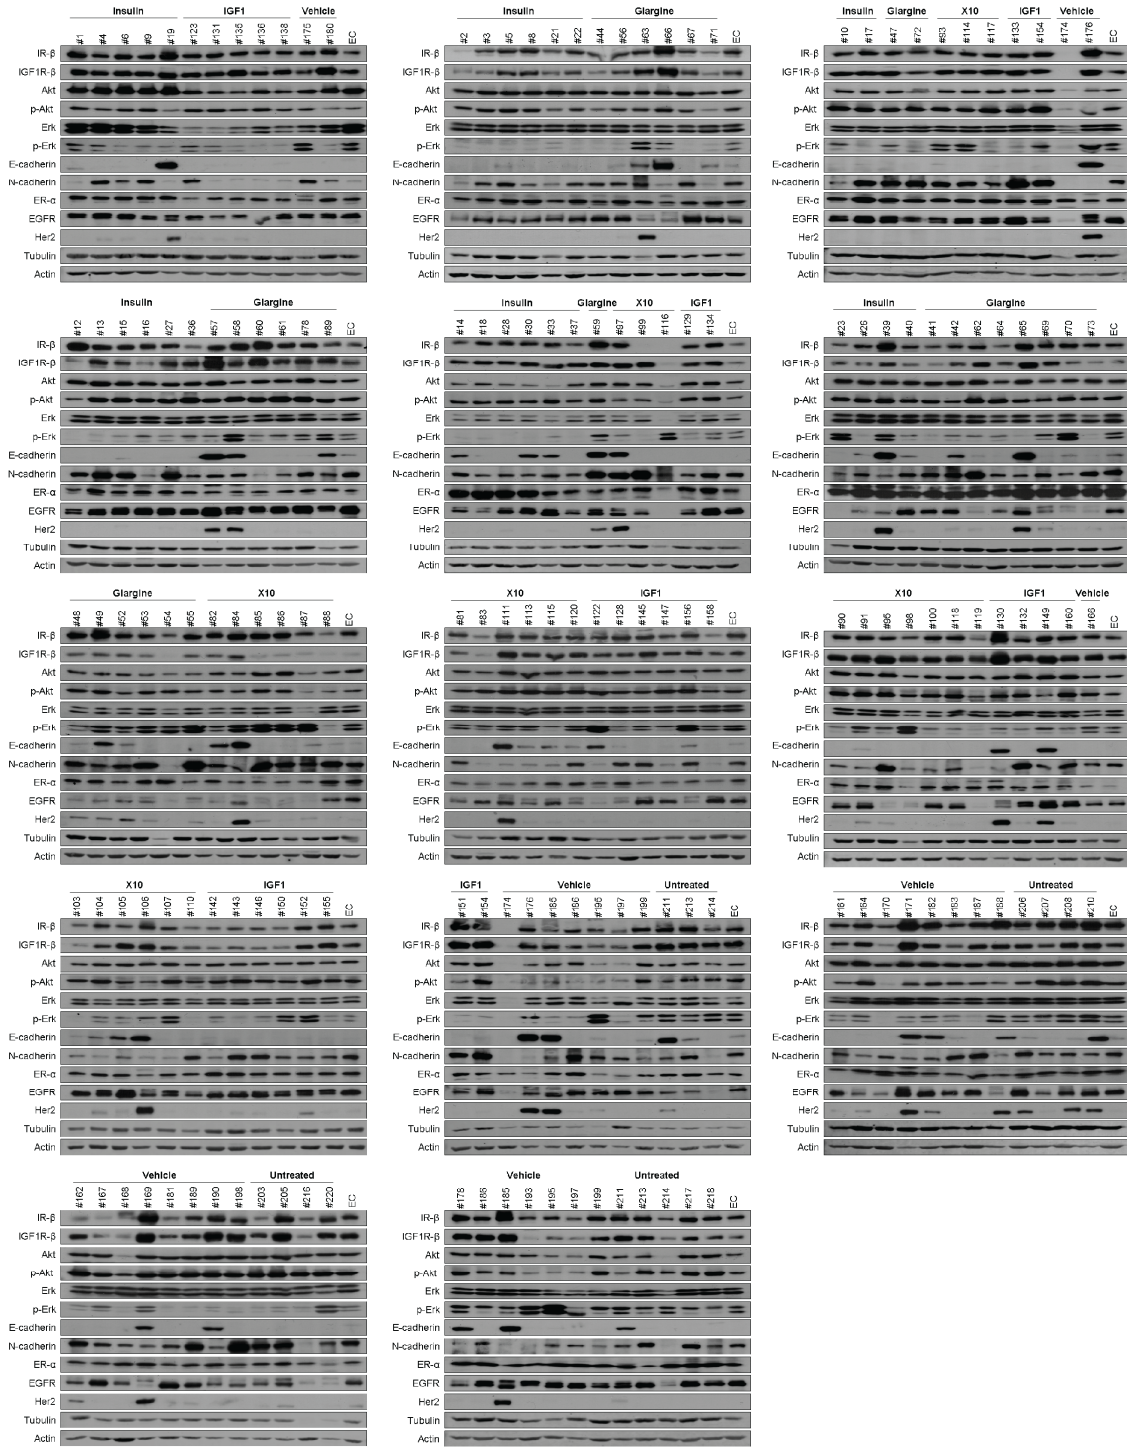

Supplemental Figure 4.

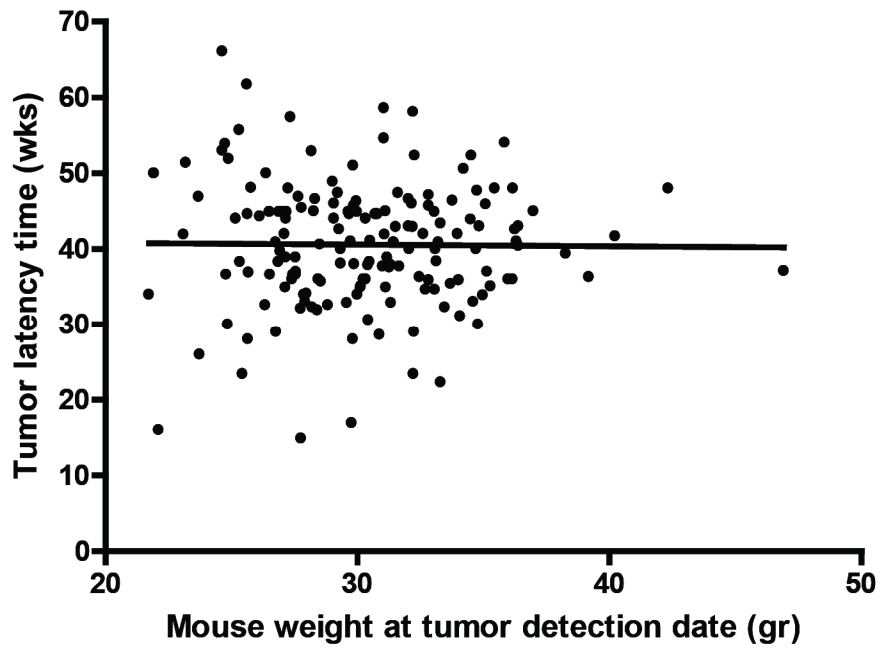

Supplemental Figure 5.
